Nucleotide sequence and properties of the murine  $\gamma_3$  immunoglobulin heavy chain gene switch region: implications for successive  $C_\gamma$  gene switching

Lawrence W. Stanton and Kenneth B. Marcu

Biochemistry Department and Molecular Biology Graduate Program, SUNY at Stony Brook, Stony Brook, NY 11794, USA

Received 7 June 1982; Revised and Accepted 6 August 1982

Abstract

During B lymphocyte differentiation, immunoglobulin heavy chain constant region ( $C_H$ ) genes undergo a unique series of DNA recombination events culminating in the  $C_H$  class switch.  $C_H$  switch (S) regions are located 2 kb 5' of each  $C_H$  gene except  $\delta$  (i.e.  $\mu$ ,  $\gamma_3$ ,  $\gamma_1$ ,  $\gamma_{2b}$ ,  $\gamma_{2a}$ ,  $\epsilon$  and  $\alpha$ ). We describe the structural features of the  $\gamma_3$  switch region. Hybridization experiments show that  $S_{\gamma_3}$  has remarkable homology to both  $S_\mu$  and other  $S_\gamma$  regions while  $S_\mu$  possesses limited homology to the other  $S_\gamma$  sequences. However,  $S_\mu$  possesses extensive sequence homology with  $S_\epsilon$  and  $S_\alpha$ . The nucleotide sequence of  $S_{\gamma_3}$  reveals higher densities of  $S_\mu$  repetitive sequences (GAGCT and GGGGT) and another S region common sequence (YAGGTGG) than observed for  $S_{\gamma_1}$ ,  $S_{\gamma_{2b}}$  or  $S_{\gamma_{2a}}$ . In addition, the conservation of  $S_\mu$  like repetitive sequences in  $S_\gamma$  regions is correlated with the 5'→3'  $\gamma$  gene order (i.e.  $S_{\gamma_3}$  >  $S_{\gamma_1}$  >  $S_{\gamma_{2b}}$  >  $S_{\gamma_{2a}}$ ). A model is presented which suggests that the unique features of  $S_{\gamma_3}$  may allow for successive switches from  $C_\mu$  to any  $C_\gamma$  gene.

INTRODUCTION

Switches in the expression of immunoglobulin heavy chain constant regions ( $C_H$ ) occur during B lymphocyte differentiation (1-3). A unique series of DNA recombination events which result in the deletion of  $C_H$  genes have been implicated in the switching process (4-9).  $C_H$  gene deletions that are correlated with  $C_H$  switching have been characterized in mouse plasmacytomas (4-9), hybridomas (10), tissue culture variant myeloma cell lines (11) and lymphomas (12).  $C_H$  gene deletion events have been utilized to determine the overall organization of the  $C_H$  gene cluster which has subsequently been confirmed by molecular cloning (i.e.  $\mu$ - $\delta$ - $\gamma_3$ - $\gamma_1$ - $\gamma_{2b}$ - $\gamma_{2a}$ - $\epsilon$ - $\alpha$ ) (13).  $C_H$  gene deletions associated with switch-recombination have been proposed to occur by either intrachromosomal deletions (4,9) or by sister chromatid exchanges (14).

Two models have been proposed for the molecular mechanism(s) of  $C_H$  switch-recombination (15,16). The first suggests that  $C_H$  class specific

DNA recombinases recognize intrinsically different repetitive DNA sequences localized within intervening DNA sequences 5' of each  $C_H$  gene (S regions) (15). The second model does not preclude the basic tenants of the first but instead proposes that two short sequences (i.e. GAGCT and GGGGT) common to all S regions mediate  $C_H$  switching by homologous DNA recombination (16). The second model is supported by the fact that a uniquely large GAGCTG repeat within  $S_{\mu}$  and a significant portion of  $S_{\alpha}$  are both conserved in mice and humans (17-19). In addition to these putative switch-recombinase recognition sequences, we have recently demonstrated that analogues of a YAGGTTG prototype sequence are found immediately 5' of the recombination sites of functionally rearranged  $C_H$  genes and are also repeated in S regions (20,21).

In this report, we present the nucleotide sequence of the  $S_{\gamma_3}$  region and describe its hybridization properties with other S regions. In consideration of these results and other published cellular data on successive  $C_H$  gene switching (11,22-25), we present a model suggesting that under the appropriate circumstances the  $S_{\gamma_3}$  region may allow for successive  $C_H$  gene switches.

#### MATERIALS AND METHODS

Molecular cloning and Southern blot hybridizations (26) were all performed as described in previous publications (20,27). The  $S_{\gamma_3}$  region was subcloned into pBR322 and sequenced according to Maxam and Gilbert (28).

#### RESULTS

We have recently obtained a  $\gamma_3$  genomic clone by screening a Balb/c sperm library with a  $C_{\gamma_{2b}}$  cDNA probe (20). A restriction map of this clone, SL51, was derived as shown in Fig. 1. SL51 was shown to contain the  $C_{\gamma_3}$  gene by comparison to other published data (29) and by cross-hybridization with a  $C_{\gamma_{2a}}$  cDNA clone (30). To determine if SL51 contained  $S_{\gamma_3}$  sequences, Southern hybridization analyses (26) of restriction enzyme digests of SL51 were performed using a variety of heavy chain switch region DNA probes. As shown in Figures 2C (lane 4) and 3A (lane 2 and 2'), strong hybridization of a 0.8 kbp RI-HindIII fragment of SL51 to both our  $S_{\gamma_{2b}}$  and  $S_{\mu}$  probes (PBR1.4 and pM2-20 respectively in Fig. 1) indicates that the  $S_{\gamma_3}$  region lies about 1.9 kbp 5' of the  $\gamma_3$  coding region (see SL51 clone map in Fig. 1). This result

ORIGIN OF C<sub>H</sub> GENE 5' FLANKING DNA SEQUENCE PROBES  
AND LOCATIONS OF C<sub>H</sub> GENE SWITCH SITES

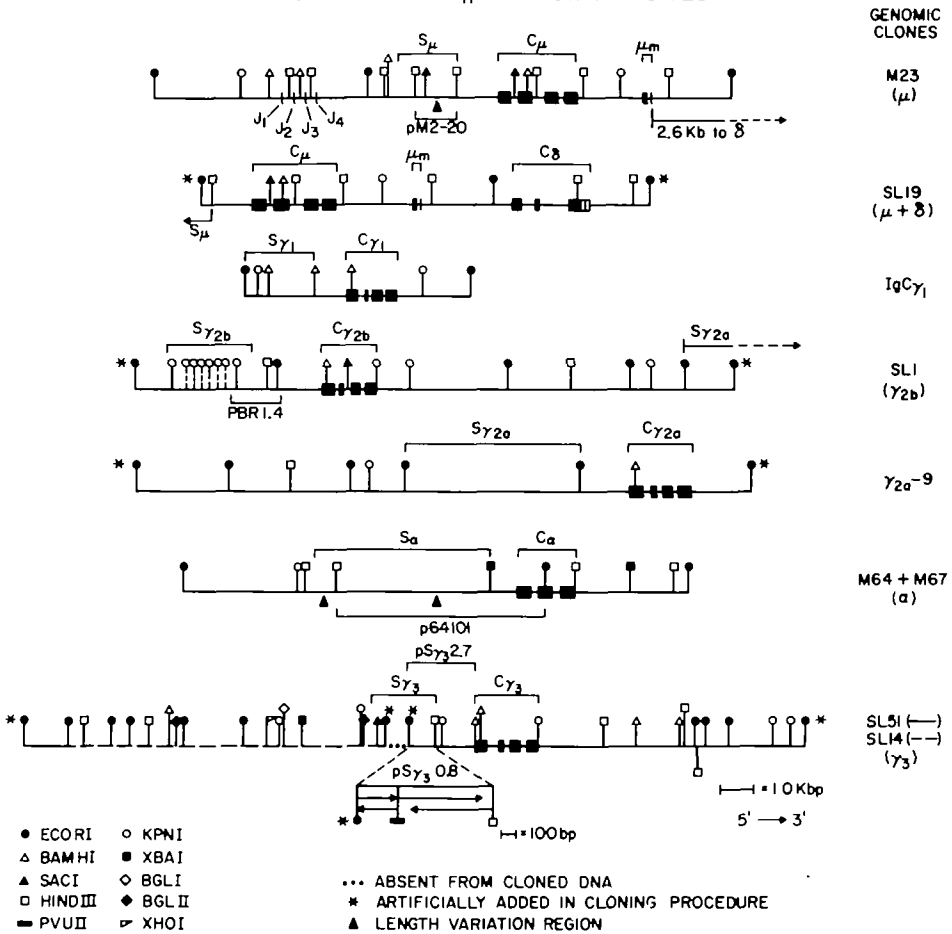

Figure 1.

Restriction maps of seven heavy chain constant region genomic clones and their 5' and 3' flanking sequence. Plasmid subclones of C<sub>H</sub> switch regions are indicated above and below the restriction maps. The DNA sequencing strategies for S<sub>γ3</sub> are shown below the γ<sub>3</sub> genomic clones SL51 + SL14. M23 (27), SL19<sup>6</sup> (33, this paper) IgC<sub>γ1</sub> (36), SL1<sub>γ2b</sub> (20), γ<sub>2a</sub><sup>9</sup> (31), M64 + M67 (27), SL51 + SL14 (20, this paper).

would appear to be in good agreement with other known switch regions which are also shown in Figure 1.

While determining the location of the S<sub>γ3</sub> region in SL51, we observed that our S<sub>μ</sub> probe exhibited more homology to S<sub>γ3</sub> than to our

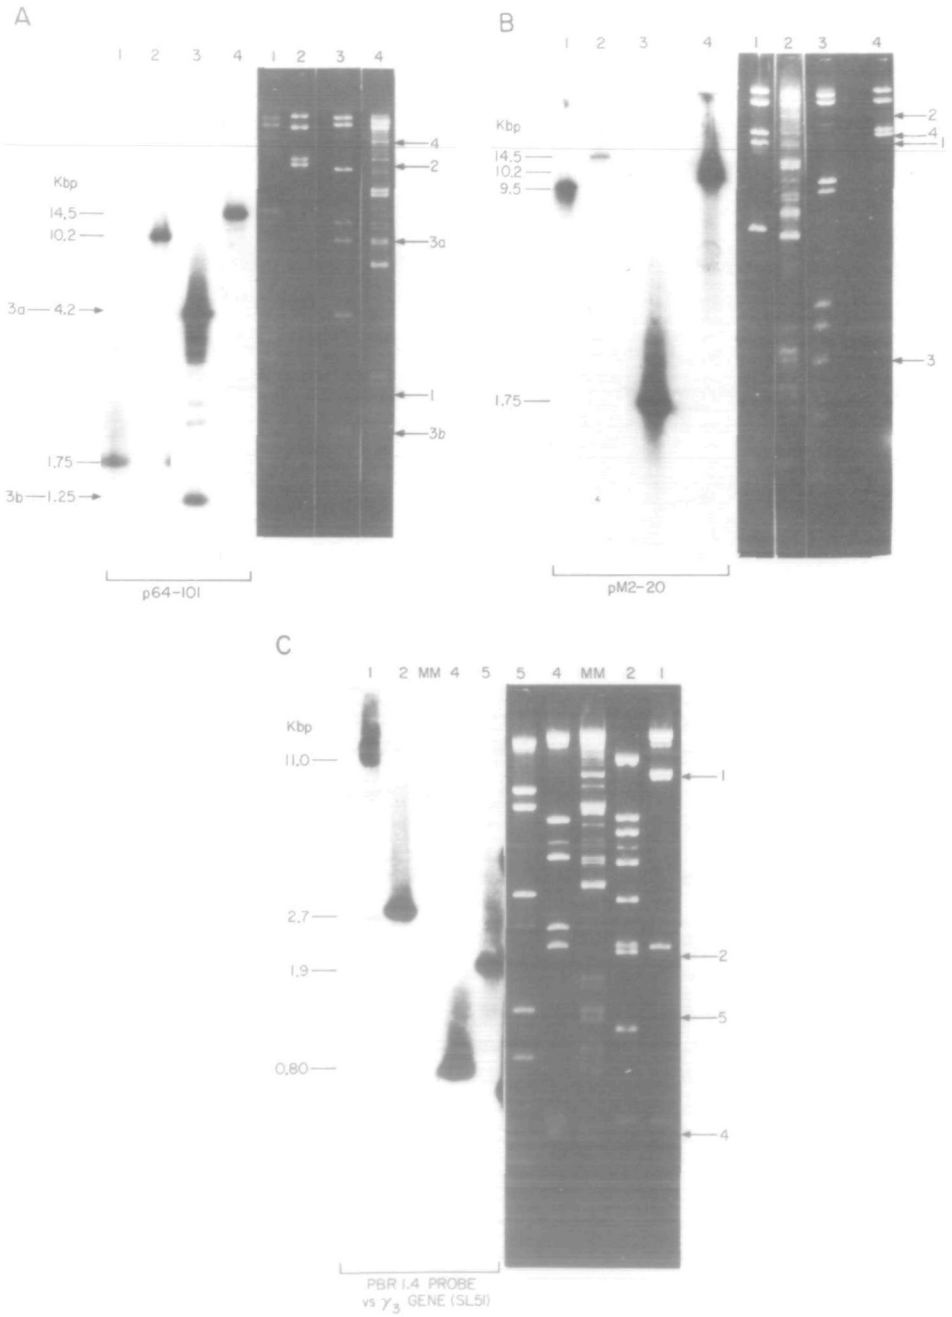

$S_{\gamma 2b}$  containing genomic clones, SL59 and SL1 (20). To facilitate our analysis of  $S_{\gamma 3}$ , a 2.7 kbp RI-BamHI fragment containing the  $S_{\gamma 3}$  region and 1.9 kb of 3' flanking sequences was prepared for a hybridization probe (see  $pS_{\gamma 3}$  2.7 in Fig. 1). Using an  $S_{\mu}$  probe ( $pM2-20$ ), Southern blot hybridizations were performed with the purified 2.7 kbp  $S_{\gamma 3}$  containing restriction fragment, the original  $\gamma_3$  genomic clone (SL51), a  $\gamma_{2b}$  genomic clone (SL1) that contains the entire  $S_{\gamma 2b}$  region and the 5' portion of  $S_{\gamma 2a}$  (20) and a restriction fragment spanning the entire  $S_{\gamma 2b}$  region. The results of this experiment are shown in Figure 3A and the clones used are depicted in Figure 1. To allow for a more thorough comparison of the quantitative difference in S region homologies, 1X and 10X exposure times of this experiment are shown in Figure 3A. We have also investigated the homology of the entire  $S_{\gamma 2a}$  region to  $S_{\mu}$  by hybridizing an  $S_{\mu}$  probe to a genomic clone containing the complete  $\gamma_{2b}-\gamma_{2a}$  intragenic region ( $\gamma_{2a}-9$  in Figure 1) (data not shown). These results clearly demonstrate that  $S_{\mu}$  possesses considerably more  $S_{\gamma 3}$  homology than  $S_{\gamma 2b}$  or  $S_{\gamma 2a}$  homology. Cross-hybridization experiments between  $S_{\mu}$  and  $S_{\alpha}$  indicate a high degree of homology (see Figure 2A) which appears comparable to the level of  $S_{\mu}-S_{\gamma 3}$  homology.

The relative homology of  $S_{\gamma 3}$  with other S regions was determined with an  $S_{\gamma 3}$  probe ( $S_{\gamma 3}$  2.7 in Fig. 1). As shown in Figure 3B (lanes

Figure 2.

A. Cross-hybridization of  $S_{\alpha}$  and  $S_{\mu}$  sequences with a complete  $S_{\alpha}$  probe ( $p_{\alpha 64-101}$ ). Track #1: HindIII digestion of  $\mu$  clone M2, Track #2: EcoRI digestion of  $\mu$  clone M2, Track #3: HindIII digestion of  $\alpha$  clone M64 and Track #4: Molecular weight marker mix containing a 14.5 kb EcoRI fragment of a J558 rearranged  $\alpha$  gene (37). Weakly hybridizing bands in Track #3 are due to deleted forms of the  $S_{\alpha}$  region (32).

B. Cross-hybridization of  $S_{\mu}$  and  $S_{\alpha}$  sequences with an  $S_{\mu}$  probe ( $pM2-20$ ). Track #1: EcoRI digestion of  $\alpha$  clone M64, Track #2: Molecular weight marker mix, Track #3: HindIII digestion of  $\mu$  clone M2 and Track #4: EcoRI digestion of  $\mu$  clone M2.

C. Cross-hybridizations of  $S_{\gamma 2b}$  and  $S_{\gamma 3}$  sequences with an  $S_{\gamma 2b}$  probe ( $pBR1.4$ ). Track #1: EcoRI digestion of  $\gamma_3$  clone SL51, Track #2: EcoRI+BamHI double digestion of SL51, Track #3: Molecular weight marker mix, Track #4: EcoRI+HindIII double digestion of SL51 and Track #5: KpnI digestion of SL51.

All experiments were performed on 0.8% agarose gels which were transferred to nitrocellulose filters and hybridized as previously described (20,27). Ethidium stained gels are shown adjacent to the appropriate autoradiographs for comparison. Hybridizing bands are identified to the right of the ethidium pictures by their gel track numbers. Equivalent weights of DNA samples (following corrections for sequence length) were applied to all tracks.

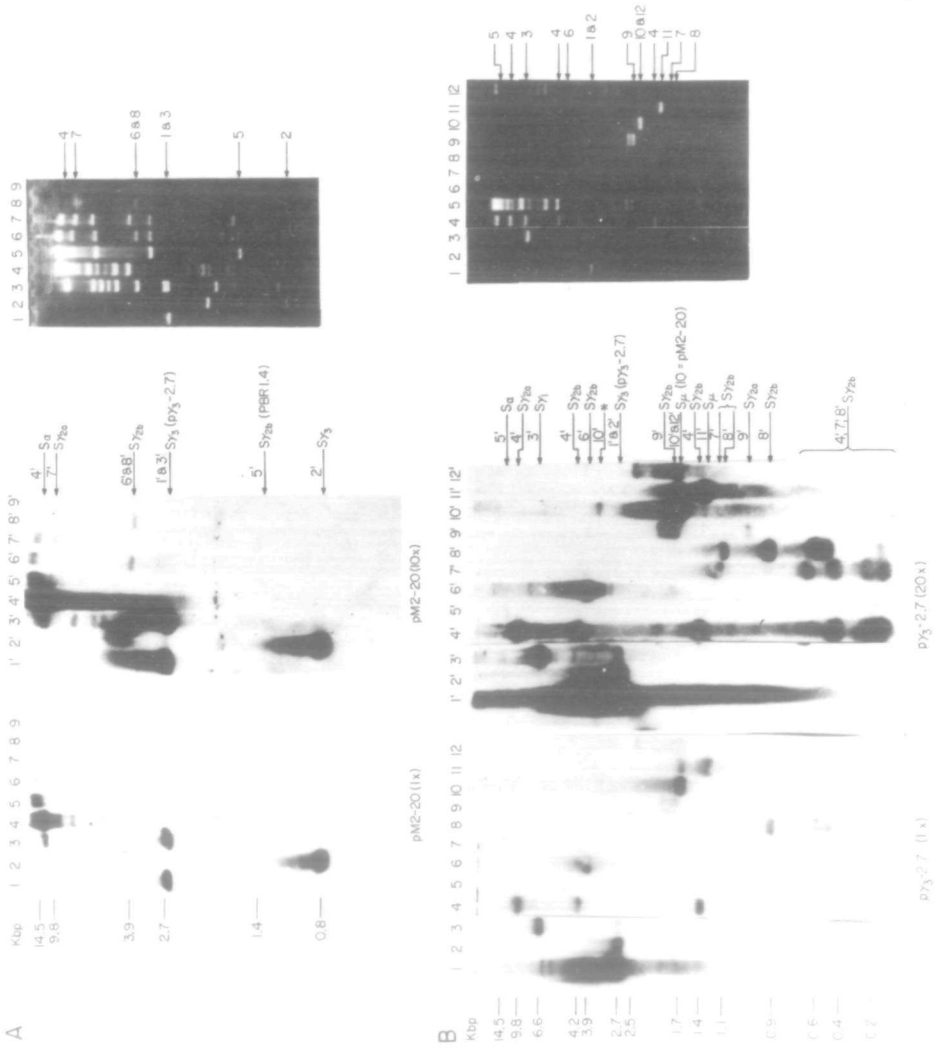

3,4,6-8), the  $S_{\gamma 3}$  region possesses extensive homology with  $S_{\gamma 1}$ ,  $S_{\gamma 2a}$  and all the repeating units that define  $S_{\gamma 2b}$ . A HindIII digestion of a 10.2 kb RI fragment containing the  $C_{\mu}$  gene and neighboring sequences (see clone M2 in Fig. 1) contains only one  $S_{\gamma 3}$  homologous band corresponding to the  $S_{\mu}$  region (lanes 10 and 10' of Fig. 3B). Therefore, the  $S_{\gamma 3}$  2.7 probe does not possess detectable sequence homology to DNA sequences 3' of  $C_{\mu}$  which span the  $\mu$ - $\delta$  intragenic region (33) (see Fig. 1 for restriction maps).  $S_{\mu}$  and  $S_{\alpha}$  DNA probes also fail to hybridize to restriction fragments corresponding to the  $\mu$ - $\delta$  intragenic region (see Fig. 2A (13)). These findings would collectively argue that  $S_{\gamma 3}$  uniquely possesses a high density of both  $S_{\mu}$  and  $S_{\gamma}$  like sequences while DNA sequences 5' of  $C_{\delta}$  possess no detectable S region homology. A summary of these results is present in Figure 4.

To further investigate the novel features of  $S_{\gamma 3}$ , we determined the complete nucleotide sequence of the  $S_{\gamma 3}$  region in our  $S_{\gamma 3}$  2.7 probe. An 800 bp RI- $H_3$  fragment that contains  $S_{\gamma 3}$  was subcloned into pBR322, and DNA sequencing strategies are shown in Figure 1. The complete sequence

Figure 3

A. Comparative cross-hybridization of  $S_{\gamma 3}$ ,  $S_{\gamma 2b}$  and  $S_{\gamma 2a}$  sequences with an  $S_{\mu}$  probe (pM2-20). Track #1: RI-BamHI insert of p $S_{\gamma 3}$  2.7, Track #2: RI + HindIII double digestion of p $S_{\gamma 3}$  2.7 insert, Track #3: RI + BamHI double digestion of SL51, Track #4: molecular weight marker mix, Track #5: EcoRI digestion of clone SL59  $\gamma 2b$ , Track #6: EcoRI digestion of clone SL1  $\gamma 2b$ , Track #7: KpnI digestion of clone SL1, Track #8: 3.9 kb  $S_{\gamma 2b}$  restriction fragment of clone SL1, Track #9: KpnI digestion of Track #8 DNA.

B. Comparative cross-hybridization of  $S_{\gamma 3}$ ,  $S_{\gamma 1}$ ,  $S_{\gamma 2b}$ ,  $S_{\gamma 2a}$ ,  $S_{\alpha}$  and  $S_{\mu}$  with an  $S_{\gamma 3}$  probe (p $S_{\gamma 3}$  2.7). Track #1 and #2: p $S_{\gamma 3}$  2.7 insert, Track #3: Ig  $C_{\gamma 1}$  insert, Track #4: KpnI digestion of clone SL1, Track #5: Molecular weight marker mix, Track #6: 3.9 kb  $S_{\gamma 2b}$  restriction fragment of clone SL1, Track #7: KpnI digestion of Track 6 DNA, Track #8: BglII digestion of Track 6 DNA, Track #9: 2.0 kb EcoRI-SacI DNA fragment from clone SL1  $\gamma 2b$  (containing 1.4 kb of  $C_{\gamma 2b}$  5' flanking DNA,  $C_{H1}$  and Hinge sequences of  $C_{\gamma 2b}$  as shown in Fig. 1), Track #10: pM2-20 insert, Track #11: SacI digestion of the pM2-20 insert, Track #12: HindIII digestion of  $\mu$  clone M2.

Similar quantities of DNA fragments with appropriate length corrections are applied to all tracks. Tracks 1-9' in Panel A and Tracks 1'-12' in Panel B represent increased exposures obtained with intensifier screens. Ethidium pictures of the appropriate agarose gels are shown for comparison. Hybridizing bands corresponding to various  $C_{\mu}$  switch regions (see Fig. 1 for restriction maps and switch region locations) are indicated to the right of each autoradiograph and ethidium picture with their appropriate track numbers. A weak band in track 10' indicated by an asterisk (\*) represents an  $S_{\mu}$  partial digestion product. An  $S_{\mu}$  partial digestion band is also present in lane 12'.

COMPARATIVE DNA SEQUENCE HOMOLOGIES  
OF MOUSE C<sub>H</sub> GENE SWITCH REGIONS

|                                     |                             | HYBRIDIZATION PROBES |                  |                            |                            |                             |                             |                |
|-------------------------------------|-----------------------------|----------------------|------------------|----------------------------|----------------------------|-----------------------------|-----------------------------|----------------|
| SWITCH REGION RESTRICTION FRAGMENTS |                             | S <sub>μ</sub>       | 5'C <sub>δ</sub> | S <sub>γ<sub>3</sub></sub> | S <sub>γ<sub>1</sub></sub> | S <sub>γ<sub>2b</sub></sub> | S <sub>γ<sub>2a</sub></sub> | S <sub>α</sub> |
|                                     | S <sub>μ</sub>              | ++                   | ND               | +                          | ND                         | + -                         | ND                          | +              |
|                                     | 5'C <sub>δ</sub>            | -                    | ++               | -                          | ND                         | -                           | ND                          | -              |
|                                     | S <sub>γ<sub>3</sub></sub>  | +                    | ND               | ++                         | ND                         | +                           | ND                          | +              |
|                                     | S <sub>γ<sub>1</sub></sub>  | + -                  | ND               | +                          | ++                         | +                           | ND                          | -              |
|                                     | S <sub>γ<sub>2b</sub></sub> | + -                  | ND               | +                          | ND                         | ++                          | ND                          | -              |
|                                     | S <sub>γ<sub>2a</sub></sub> | + -                  | ND               | +                          | ND                         | +                           | ++                          | -              |
|                                     | S <sub>α</sub>              | +                    | ND               | +                          | -                          | -                           | ND                          | ++             |

++ = IDENTICAL SEQUENCES  
 + = SUBSTANTIAL SEQUENCE HOMOLOGY  
 + - = LOW BUT DETECTABLE SEQUENCE HOMOLOGY  
 - = NEGLIGIBLE OR NO SEQUENCE HOMOLOGY  
 ND = NOT DETERMINED

Figure 4.  
A qualitative summary of the data presented in Figures 2 and 3.

of the insert of pS<sub>γ<sub>3</sub></sub> 0.8 is presented in Figure 5. The γ<sub>3</sub> gene switch region is composed of a repeating unit of about 49 bp. This is analogous to other γ switch regions where 49 bp repeats have also been described (34). The S<sub>γ<sub>3</sub></sub> repeating units would appear to be more highly conserved than the repeats within other S<sub>γ</sub> regions (34). A prevalent sequence for the S<sub>γ<sub>3</sub></sub> repeating unit was deduced from the nucleotide sequence. A comparison of the S<sub>γ<sub>3</sub></sub> prevalent sequence to the consensus sequences of other heavy chain switch regions is presented in Figure 6. The homologies exhibited between S<sub>γ<sub>3</sub></sub> and the other S<sub>γ</sub> regions detected by hybridization experiments in Figures 2C and 3B are easily explained. All S<sub>γ</sub> regions exhibit a relatively high degree of sequence homology. In addition, the degree of sequence homology shared by the four S<sub>γ</sub> regions would appear to reflect the chromosome order of the γ genes



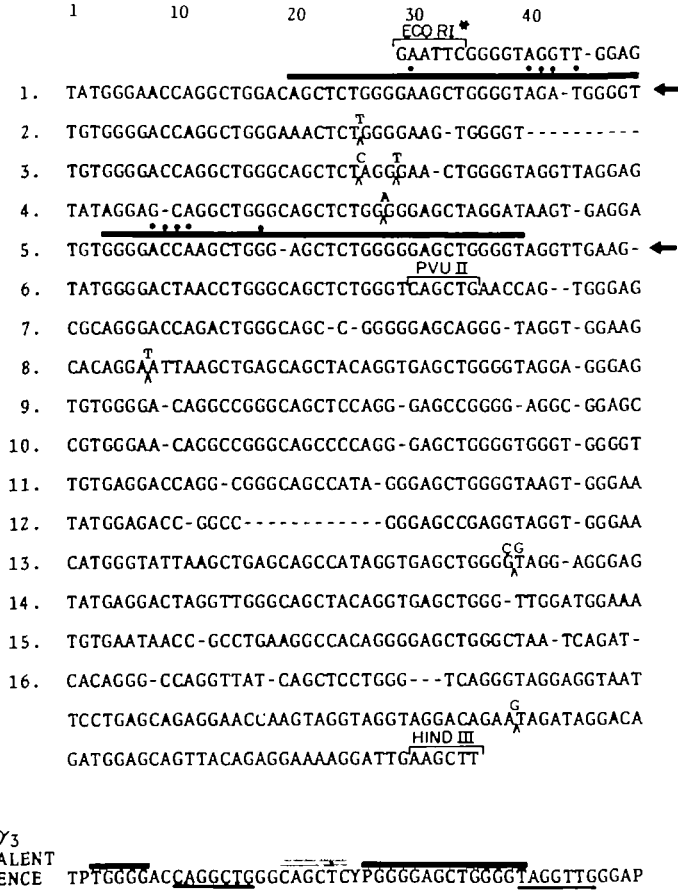

Downloaded from https://academic.oup.com/nar/article/10/1/19/5993123/79062 by guest on 23 April 2024

Figure 5

Nucleotide sequence of 883 nucleotides of the EcoRI-HindIII insert of pS<sub>3</sub> 0.8. DNA sequence analysis was performed as described (20, 28, 36). DNA sequence is displayed in 49 bp repeating units. EcoRI and HindIII sites were labeled with (<sup>-32</sup>P) dXTPs (> 3,000 Cimmol) and Klenow polymerase essentially as described (38) and the solitary internal PvuII site was labeled with (γ-<sup>32</sup>P) ATP and polynucleotide kinase (28). GAGCT and GGGGT sequences common to the S<sub>μ</sub> repeat are indicated by overhead solid bars. CAGCTC sequences are indicated by overhead stippled bars. YAGGTTG analogues (21) are underlined. A YAGGTTG like sequence is defined as such if at least four matched, contiguous nucleotides are present (21). Mismatched nucleotides are marked by solid dots. Two S<sub>3</sub> 49 mer repeat units which closely resemble an S<sub>μ</sub> like tandem repeat are denoted by arrows to the right of the sequence.

| S REGION<br>PREVALENT<br>SEQUENCES: |                                                                                  | RELATIVE<br>HOMOLOGIES (MAX) |     |     |
|-------------------------------------|----------------------------------------------------------------------------------|------------------------------|-----|-----|
| S <sub>γ3</sub>                     | TPTGGGGACCAGGCTGGGCAGCTCYPGGGGAGCTGGGGTAGGTGGGAP                                 | 100                          |     |     |
| S <sub>γ1</sub>                     | TPTGGGPCCAGGCTGAGCAGCTACAGGGGAGCTGGGGYAPPTGGGAP                                  | 95                           | 100 |     |
| S <sub>γ2b</sub>                    | TPTGGGGACCAGCTCCTAGCAGCTPTGGGGAGCTGGGCAAGTTPGGAP                                 | 87                           | 88  | 100 |
| S <sub>γ2a</sub>                    | NGTGGGGACCAGGCAGTACAGCTCTGGGPGGNCAGG-CAG-TACAGG                                  | 70                           | 70  | 70  |
| S <sub>ε</sub>                      | GGGCTGGGCTGAGCTGPGCTGAGCTGPGCTGAGCTGPPNT                                         |                              |     |     |
| S <sub>α</sub>                      | ATGAGCTGGGATGAGCTGAGCTAGGCTGGAAATAGGCTGGGCTGGCTGGTGTGGAGCTGGGTAGGCTGAGCTGAGCTGGA |                              |     |     |
| S <sub>μ</sub>                      | GAGCTGAGCTGGGGTCAGCT                                                             |                              |     |     |

Figure 6

Comparisons of structural features of prevalent repeat sequences of S<sub>γ3</sub> (this paper), S<sub>γ1</sub> (34), S<sub>γ2b</sub> (34), S<sub>γ2a</sub> (35), S<sub>α</sub> (14,15), S<sub>μ</sub> (16) and S<sub>ε</sub> (35). S<sub>γ</sub> sequence homologies were determined on the basis of a 48 mer consensus repeat length and are indicated to the right of each S<sub>γ</sub> prevalent sequence. Gaps and insertions were introduced to yield the maximum length of homologous DNA sequences. S<sub>γ</sub> homology to S<sub>ε</sub>, S<sub>α</sub> and S<sub>μ</sub> were not determined due to their radically different repeat lengths.

(i.e. S<sub>γ3</sub> > S<sub>γ1</sub> > S<sub>γ2b</sub> > S<sub>γ2a</sub>). However, the high degree of sequence homology between the γ switch regions does not help to explain why S<sub>γ3</sub> uniquely displays strong homology to S<sub>μ</sub> while the other γ switch regions only weakly hybridize to S<sub>μ</sub>. The S<sub>γ3</sub> sequence contains 35% more of the S<sub>μ</sub> repetitive sequences, GAGCT and GGGGT, than an analogous length of S<sub>γ2b</sub> (34), and this is reflected to some degree in the S<sub>γ3</sub> prevalent sequence (see Fig. 6). The reason for the high S<sub>μ</sub>-S<sub>γ3</sub> homology exhibited in the hybridization experiments is also evident from the fact that two of the S<sub>γ3</sub> 49 bp units contain an internal tandem repeat which closely resembles the sequence organization of the S<sub>μ</sub> tandem repeat (16). S<sub>γ3</sub> also possesses the short sequence CAGCTC in most of its repeating units. This sequence is the complement of GAGCTG, the highly repeated 6 mer found within the μ switch region. These results indicate that both DNA strands of the S<sub>γ3</sub> region have sequence homology to the S<sub>μ</sub> repeats.

DISCUSSION

We have presented the nucleotide sequence of the 3' end (~900 bp) of the Balb/c S<sub>γ3</sub> region. Using these results and data obtained by others, the entire length of S<sub>γ3</sub> is estimated to be ~4 kbp which is

comparable to the size of  $S_{\gamma 2b}$  (34). However, the 49 bp  $S_{\gamma 3}$  repeat unit would appear to be poorly conserved at the extreme 5' and 3' ends of the  $S_{\gamma 3}$  region (see Fig. 5) (34, this paper). The switch-recombination site of the expressed  $\gamma_3$  gene of the J606 Balb/c myeloma has recently been determined and is located  $\sim 300$  bp 5' of the  $S_{\gamma 3}$  sequence reported here (35). The  $S_{\gamma 3}$  49 bp repeating unit near the J606  $\gamma_3$  gene recombination site is virtually identical in nucleotide sequence characteristics to the  $\sim 900$  bp of  $S_{\gamma 3}$  sequence presented in this report.

Hybridization and DNA sequence data presented here show that the  $\gamma_3$  switch region possesses substantially more  $S_{\mu}$  homology than observed with other  $S_{\gamma}$  regions.  $S_{\gamma 3}$  contains a high density of the  $S_{\mu}$  repetitive sequences, GAGCT and GGGGT. Examples of YAGGTG like sequences, which have been implicated in  $C_H$  switch-recombination (20,21), are more prevalent in  $S_{\gamma 3}$  than in other  $S_{\gamma}$  regions (see Fig. 6). The degree of divergence of  $S_{\mu}$  like sequences within the different  $S_{\gamma}$  regions appears to follow the  $C_{\gamma}$  gene order (i.e.  $S_{\gamma 3} < S_{\gamma 1} < S_{\gamma 2b} < S_{\gamma 2a}$ ) (see Fig. 6). However,  $S_{\epsilon}$  and  $S_{\alpha}$  possess the highest degree of  $S_{\mu}$  homology (13,35, this paper) even though the  $\epsilon$  and  $\alpha$  genes follow  $\gamma_{2a}$  in the  $C_H$  gene order (13,31).

#### Implications for Successive $C_{\gamma}$ Gene Switching

When a switch from  $C_{\mu}$  to a  $C_{\gamma}$  gene occurs during an immune response, an initial encounter with  $S_{\gamma 3}$  may help to facilitate further switching to other  $C_{\gamma}$  genes. The strong homology between  $S_{\mu}$  and  $S_{\gamma 3}$  and the high density of other switch site recognition sequences in  $S_{\gamma 3}$  (i.e. YAGGTG like sequences) could conceivably favor such a phenomenon. At this point, either the  $\gamma_3$  gene would be expressed or a transient  $S_{\mu}$ - $S_{\gamma 3}$  recombination event would allow switching to continue to downstream genes. The homologies displayed between  $S_{\gamma 3}$  and the other  $S_{\gamma}$  regions which are not shared by  $S_{\mu}$  would accommodate this subsequent event. In addition, we would also predict that  $C_{\epsilon}$  and  $C_{\alpha}$  switches would not require  $S_{\gamma 3}$  mediation since  $S_{\epsilon}$  and  $S_{\alpha}$  already possesses extensive homology with  $S_{\mu}$  (13,32,35). This model would require an initial recombination event between the  $S_{\mu}$  GAGCT tandem repeat (16) and the homologous  $S_{\gamma 3}$  region. We have recently shown that the  $S_{\mu}$  sites employed by nine rearranged  $C_H$  genes (representing  $\gamma_1$ ,  $\gamma_{2b}$ , and  $\alpha$  isotypes) are located 3' of a YAGGTG consensus sequence and not within the  $S_{\mu}$  GAGCT repeat (21). GAGCT tandem repeats do not appear to directly participate in most  $C_H$  gene switches and appear to be deleted

in the initial recombination event (21). However, the  $S_{\mu}$  site employed by the J606  $\gamma_3$  gene is found within  $S_{\mu}$  tandem GAGCT sequences (35).

Myeloma and hybridoma cell lines are known to possess the potential to undergo successive  $C_H$  gene switches *in vitro*. The MPC-11 myeloma is capable of generating  $\gamma_{2b} \rightarrow \gamma_{2a}$  switch variants (22) by a DNA rearrangement which deletes the parental cell's expressed  $\gamma_{2b}$  gene (11). The X-63 hybridoma cell line undergoes spontaneous successive  $C_H$  switches (i.e.  $\gamma_3 \rightarrow \gamma_1 \rightarrow \gamma_{2b} \rightarrow \gamma_{2a}$ ) at low frequency (i.e.  $10^{-6}$ - $10^{-7}$  per cell per generation) which are correlated with  $C_H$  gene rearrangements (23,24). The role of a successive  $C_H$  gene switching pathway in normal B cell isotype switches remains to be determined.

Recent observations by Mongini, Paul and Metcalf on the  $C_H$  switching patterns of normal B cell clones responding to TNP ficoll (a T cell independent, Type II antigen) would be compatible with a successive  $C_H$  gene switching mechanism (25). In this study, B cell clones reacting with TNP-ficoll were prepared by the splenic-focus procedure in irradiated nude mouse recipients (25). All cultured B cell clones reacting with TNP-ficoll were found to express  $C_{\mu}$ . However, the majority of B cell clones which also co-expressed a  $\gamma$  isotype other than  $\gamma_3$  invariably expressed  $\gamma_3$  as well. These results in combination with the unique structural features of  $S_{\gamma_3}$  defined in this report would collectively argue that switches to  $C_{\gamma}$  genes may proceed through an initial  $S_{\mu} \rightarrow S_{\gamma_3}$  event in some instances. An initial  $S_{\mu} \rightarrow S_{\gamma_3}$  event may be preferred in certain immune responses (i.e. T cell Independent responses) but need not be an obligatory prerequisite for all  $\mu \rightarrow \gamma$  switches. Interestingly, B cell clones which produce IgA and IgE antibody have a much lower proportion of cells which also produce  $\gamma_3$  (P. Mongini, personal communication). This would suggest that  $\mu \rightarrow \alpha$  and  $\mu \rightarrow \epsilon$  switches within B cell clones are not necessarily preceded by an initial  $S_{\mu} \rightarrow S_{\gamma_3}$  event. This latter finding nicely agrees with the extensive  $S_{\mu}$  sequence homology shared by both  $S_{\epsilon}$  and  $S_{\alpha}$  which would presumably obviate the need for  $S_{\gamma_3}$  participation in successive switching to the  $C_{\epsilon}$  and  $C_{\alpha}$  genes. However, successive, but not necessarily stepwise, isotype switching has been observed in B cell lines which eventually express IgA (39).

We consider the idea of  $S_{\gamma_3}$  participation in successive  $C_H$  switching a working hypothesis. Results obtained with spontaneously arising class switch variants clearly indicate that B cells have the

potential to undergo successive  $C_H$  gene switches (11-24). We also believe that the excellent correlation between the results presented here and the cellular data on the TNP ficoll immune response (25) is a compelling argument for such a model. Indeed, one could also argue that  $C_H$  switching in other T cell independent immune responses may occur through  $S_{\gamma 3}$  participation. An excellent way to test part of our hypothesis would be to search for footprints or vestiges of  $S_{\gamma 3}$  in the switch-recombination sites of functionally rearranged  $\gamma_1$ ,  $\gamma_{2b}$  or  $\gamma_{2a}$  genes obtained from hybridomas prepared with B lymphocytes responding to TNP-ficoll or a T cell independent mitogen like lipopolysaccharide (LPS).

#### ACKNOWLEDGEMENTS

We thank Meryl Diamond for technical assistance and T. Honjo for supplying us with CH4A clone  $\gamma_{2a}$ -9.

We are grateful to Drs. William Paul, Patricia Mongini and Linda Harris for helpful, stimulating discussions during the preparation of this manuscript. We thank Patricia Mongini, William Paul and Tasuku Honjo for supplying us with preprints of their manuscripts prior to their publication. We would also like to especially acknowledge the important suggestions of Patricia Mongini in helping us to correlate our results with her recent findings on  $C_H$  gene switches during TNP ficoll immune responses. This research was supported by NIH grants GM 26939 and AI 000416. KBM is a Research Career Development Awardee of the National Institute of Allergy and Infectious Diseases.

#### REFERENCES

1. Nossal, G.J.V., Warner, N. and Lewis, H. (1971) *Cell. Immun.* 2, 41-53.
2. Raff, M.C. (1976) *Cold Spring Harb. Symp. Quant. Biol.* 41, 159-162.
3. Pernis, B., Forni, L. and Luzzati, L., *ibid.* 175-183.
4. Honjo, T. and Kataoka, T. (1978) *Proc. Natl. Acad. Sci. USA* 75, 2140-2144.
5. Coleclough, C., Cooper, D. and Perry, R.P. (1980) *Proc. Natl. Acad. Sci. USA* 77, 1422-1426.
6. Cory, S. and Adams, J.M. (1980) *Cell* 19, 37-51.
7. Rabbitts, T.H., Forster, A., Dunnick, W. and Bentley, D.L. (1980) *Nature* 283, 351-356.
8. Cory, S., Jackson, J. and Adams, J.M. (1980) *Nature* 285, 450-456.
9. Yaoita, Y. and Honjo, T. (1980) *Nature* 286, 850-853.
10. Hurwitz, J., Coleclough, C. and Cebra, J. (1980) *Cell* 22, 349-359.
11. Eckhardt, L., Tilley, S., Lang, R.B., Marcu, K.B. and Birshstein, B.K. (1982) *Proc. Natl. Acad. Sci. USA*, 79, 3006-3010.

12. Stavnezer, J., Marcu, K.B., Sirlin, S., Alhadeff, B. and Hammerling, U. (1982) *Mol. Cell. Biol.*, in press.
13. Shimizu, A., Takahashi, N., Yaoita, Y. and Honjo, T. (1982) *Cell* 28, 499-506.
14. Oyata, M., Kataoka, T., Nakai, S., Yamagishi, H., Takahashi, N., Yamawaki-Kataoka, Y., Nikaido, T., Shimizu, A. and Honjo, T. (1981) *Proc. Natl. Acad. Sci. USA* 78, 2437-2441.
15. Davis, M.M., Kim, S.K. and Hood, L. (1980) *Science* 209, 1360-1365.
16. Nikaido, T., Nakai, S. and Honjo, T. (1981) *Nature* 292, 845-858.
17. Ravetch, J.V., Kirsch, I.R., Leder, P. (1980) *Proc. Natl. Acad. Sci. USA* 77, 6734-6738.
18. Takahashi, N., Nikai, S. and Honjo, T. (1980) *Nuc. Acids Res.* 8, 5983-5991.
19. Rabbitts, T.H., Forster, A. and Milstein, C.P. (1981) *Nuc. Acids Res.* 9, 4509-4524.
20. Lang, R.B., Stanton, L.W. and Marcu, K.B. (1982) *Nuc. Acids Res.* 10, 611-630.
21. Marcu, K.B., Lang, R.B., Stanton, L.W. and Harris, L. (1982) *Nature* 289, 87-89.
22. Francus, T. and Birshtein, B. (1978) *Biochemistry* 17, 4324-4331.
23. Radbruch, A., Liesegang, B. and Rajewsky, K. (1980) *Proc. Natl. Acad. Sci. USA* 77, 2909-2913.
24. Beyreuther, K., Bovens, J., Dildrop, R., Dorff, H., Geske, T., Liesegang, B., Muller, C., Neuberger, M.S., Radbruch, A., Rajewsky, K., Sablitzky, F., Schreier, P.H. and Zaiss, S. (1981). ICN-UCLA Symposium on Molecular and Cellular Biology, Vol. XX (C. Janeway, E.E. Sercarz, H. Wigzell and C.F. Fox eds.) Academic Press, New York, 229-244.
25. Mongini, P.K.A., Paul, W.E. and Metcalf, E.S. (1982) *J. Exp. Med.* 155, 884-902.
26. Southern, E.M. (1975) *J. Mol. Biol.* 98, 503-517.
27. Marcu, K.B., Banerji, J., Penncavage, N.A., Lang, R. and Arnheim, N. (1980) *Cell* 22, 187-196.
28. Maxam, A.M. and Gilbert, W. (1980) *Meth. Enzymol.* 65, 499-559.
29. Adams, J.M., Webb, E., Gerondakis, S. and Cory, S. (1980) *Nuc. Acids Res.* 8, 6019-6032.
30. Sikorav, J.L., Auffray, C. and Rougon, F. (1980) *Nuc. Acids Res.* 8, 3143-3155.
31. Shimizu, A., Takahashi, N., Yamawaki-Kataoka, Y., Nishida, Y., Kataoka, T. and Honjo, T. (1981) *Nature*, 289, 149-153.
32. Marcu, K.B., Arnheim, N., Banerji, J., Penncavage, N.A., Seperack, P., Lang, R., Miesfield, R., Harris, L. and Greenberg, R. (1980) *Cold Spring Harb. Symp. Quant. Biol.* 45, 899-911.
33. Liu, C.P., Tucker, P.W., Mushinski, J.F. and Blattner, F.R. (1980) *Science* 209, 1348-1353.
34. Kataoka, T., Miyata, T. and Honjo, T. (1981) *Cell* 23, 357-368.
35. Nikaido, T., Yamawaki-Kataoka, Y. and Honjo, T. (1982) *J. Biol. Chem.* 257, 7322-7329.
36. Sakano, H., Rogers, J.H., Huppi, K., Brack, C., Trannecker, A., Maki, R., Wall, R. and Tonegawa, S. (1979) *Nature* 277, 627-633.
37. Harris, L.J., Lang, R.B. and Marcu, K.B. (1982) *Proc. Natl. Acad. Sci. USA*, 79, 4175-4179.
38. Sakano, H., Huppi, K., Heinrich, G., and Tonegawa, S. (1979) *Nature* 280, 288-294.
39. Gearhart, P.J., Hurwitz, J.L. and Cebra, J.J. (1980) *Proc. Natl. Acad. Sci. USA*, 77, 5424-5428.
